# Supplementary material
Source: publisher site journal article supplement (https://www.dovepress.com/article/616722)
Supplement: Supplementary file 1 [file 616722%20Revised%20Supplementary%20Material.docx]

**Supplementary Table S1** Keyword Standardization Rules

| Original keyword | Standardized keyword |
| --- | --- |
| abt 494 | jak inhibitor therapy |
| active crohns disease | inflammatory bowel disease |
| active ulcerative colitis | inflammatory bowel disease |
| adalimumab | biologic therapy |
| alopecia-areata | alopecia areata |
| antibiotic associated diarrhea | antibiotic-associated diarrhea |
| antibiotic-associated diarrhoea | antibiotic-associated diarrhea |
| atopic eczema | atopic dermatitis |
| atopic-dermatitis | atopic dermatitis |
| autoimmune diseases | autoimmune disease |
| autoimmune disorders | autoimmune disease |
| autoimmune-diseases | autoimmune disease |
| baricitinib | jak inhibitor therapy |
| biologic agents | biologic therapy |
| biological agents | biologic therapy |
| biological drugs | biologic therapy |
| biological products | biologic therapy |
| biological therapy | biologic therapy |
| biologics | biologic therapy |
| biotherapeutic agent | biologic therapy |
| biotherapeutic agents | biologic therapy |
| cardiovascular diseases | cardiovascular disease |
| celiac-disease | celiac disease |
| comorbidities | comorbidity |
| comorbidity profiles | comorbidity |
| crohn disease | inflammatory bowel disease |
| crohn’s disease | inflammatory bowel disease |
| crohns | inflammatory bowel disease |
| crohns disease | inflammatory bowel disease |
| crohn's disease | inflammatory bowel disease |
| crohns-disease | inflammatory bowel disease |
| cytokines | cytokine |
| dupilumab | biologic therapy |
| epithelial-cells | epithelial cells |
| gut flora | gut microbiota |
| gut microbiome | gut microbiota |
| ibd | inflammatory bowel disease |
| ifn gamma | interferon-gamma |
| ifn-gamma | interferon-gamma |
| il-17 | interleukin-17 |
| immune-mediated inflammatory diseases | immune-mediated inflammatory disease |
| inflammatory bowel diseases | inflammatory bowel disease |
| inflammatory diseases | inflammatory disease |
| inflammatory-bowel-disease | inflammatory bowel disease |
| infliximab | biologic therapy |
| innate lymphoid-cells | innate lymphoid cells |
|  |  |
| **Supplementary Table S1** (continued) |  |
| Original keyword | Standardized keyword |
| intestinal flora | gut microbiota |
| intestinal microbiota | gut microbiota |
| irritable-bowel-syndrome | irritable bowel syndrome |
| jak inhibitor | jak inhibitor therapy |
| jak inhibitors | jak inhibitor therapy |
| janus kinase inhibitor | jak inhibitor therapy |
| janus kinase inhibitors | jak inhibitor therapy |
| mast-cells | mast cells |
| multiple-sclerosis | multiple sclerosis |
| necrosis factor alpha | tumor necrosis factor-alpha |
| necrosis-factor-alpha | tumor necrosis factor-alpha |
| nf kappa b | nuclear factor kappa-b |
| nf-kappa-b | nuclear factor kappa-b |
| omalizumab | biologic therapy |
| prebiotic | prebiotics |
| probiotic | probiotics |
| quality-of-life | quality of life |
| regulatory t-cells | regulatory t cells |
| rheumatoid-arthritis | rheumatoid arthritis |
| selective jak 1 inhibitor | jak inhibitor therapy |
| severe atopic dermatitis | atopic dermatitis |
| severe atopic-dermatitis | atopic dermatitis |
| systemic-lupus-erythematosus | systemic lupus erythematosus |
| t cells | t cell |
| t-cells | t cell |
| th17 cells | th17 cell |
| tnf alpha | tumor necrosis factor-alpha |
| tnf-alpha | tumor necrosis factor-alpha |
| tofacitinib | jak inhibitor therapy |
| ulcerative colitis | inflammatory bowel disease |
| ulcerative-colitis | inflammatory bowel disease |
| upadacitinib | jak inhibitor therapy |
| ustekinumab | biologic therapy |

**Supplementary Table S2** Data Processing and Bibliometric Analysis Parameters

| Analysis item / corresponding output | Input data | Software and version | Key parameters and procedures | Thresholds / filters | Output |
| --- | --- | --- | --- | --- | --- |
| Data merging, deduplication, and standardization | WoSCC plain-text files exported as full records with cited references; Scopus CSV files | Python 3.10.18 | Deduplication was first performed based on DOI. Records without DOI were matched according to normalized title, first author, and publication year. Punctuation marks and redundant spaces in titles were removed, and obvious spelling variants were harmonized. | Ambiguous matches were manually checked by two researchers. Records lacking essential bibliographic information that could not be verified were excluded. | Scopus records were converted into a WoSCC-compatible plain-text format, merged with WoSCC records, and deduplicated to generate a unified txt dataset for subsequent analyses. |
| Bibliometric-field standardization: keywords, countries/regions, authors, institutions, and journals | Unified txt dataset | Python 3.10.18 | Before visualization, keywords, countries/regions, authors, institutions, and journals were standardized for consistency. Keyword variants and obvious spelling variants were harmonized. Country/region names were standardized according to the country/region fields in the original WoSCC and Scopus affiliation data, with reference to the target journal’s requirements for country/region naming. | Obvious variants referring to the same bibliometric entity were merged after verification. Records that could not be confidently confirmed as referring to the same author, institution, journal, or keyword were retained in their original form and were not forcibly merged. Country/region standardization was performed only to harmonize source-database affiliation entries for bibliometric consistency, without altering the original affiliation information. | The final unified txt dataset was used for VOSviewer, CiteSpace, Excel, and Scimago Graphica analyses. |
| Publication trend analysis, Figure 2 | Final unified txt dataset; annual publication-count data exported from CiteSpace | CiteSpace 6.4.2; Microsoft Excel 2021 (2602) | Annual publication counts were extracted from the final dataset, exported from CiteSpace, organized in Excel, and used to calculate cumulative publication counts. | Publication years were limited to 2000–2025. | Excel was used to generate a line chart of annual publication counts and a bar chart of cumulative publication counts. |

**Supplementary Table S2** (continued)

| Analysis item / corresponding output | Input data | Software and version | Key parameters and procedures | Thresholds / filters | Output |
| --- | --- | --- | --- | --- | --- |
| Country/region geographic distribution map, Figure 3A | VOSviewer country/region co-authorship analysis output; GML file | VOSviewer 1.6.20; Scimago Graphica 1.0.53 | Node type: country/region. Analysis type: co-authorship. Counting method: full counting. Normalization method: association strength. | In VOSviewer, the minimum number of documents per country/region was set to 1 and the minimum number of citations to 0; 81 countries/regions met the thresholds and were included in the analysis. | VOSviewer output was exported as a GML file and imported into Scimago Graphica for geographic mapping. |
| Country/region collaboration network, Figure 3B | CSV files of vertices and edges exported from Scimago Graphica | R software 4.5.1 | R scripts were used to generate the country/region collaboration chord diagram, with node size representing publication output and line thickness indicating collaboration strength. | Not applied. | R was used to generate the country/region collaboration chord diagram. |
| Author collaboration network, Figure 4A | Final unified txt dataset | VOSviewer 1.6.20 | Node type: author. Analysis type: co-authorship. Counting method: full counting. Normalization method: association strength. Clustering resolution: default value. | The minimum number of documents per author was set to 3. | VOSviewer was used to generate the author collaboration network. |
| Institutional collaboration network, Figure 4B | Final unified txt dataset | VOSviewer 1.6.20 | Node type: organization/institution. Analysis type: co-authorship. Counting method: full counting. Normalization method: association strength. Clustering resolution: default value. | The minimum number of documents per institution was set to 11. | VOSviewer was used to generate the institutional collaboration network. |
| Journal publication network, Figure 5A | Final unified txt dataset | VOSviewer 1.6.20 | Node type: source. Analysis type: citation. Counting method: full counting. Normalization method: association strength. Clustering resolution: default value. | The minimum number of documents per source journal was set to 5. | VOSviewer was used to generate the journal publication network. |
| Journal co-citation network, Figure 5B | Final unified txt dataset | VOSviewer 1.6.20 | Node type: cited source. Analysis type: co-citation. Counting method: full counting. Normalization method: association strength. Clustering resolution: default value. | The minimum number of citations per cited journal was set to 100. | VOSviewer was used to generate the journal co-citation network. |

**Supplementary Table S2** (continued)

| Analysis item / corresponding output | Input data | Software and version | Key parameters and procedures | Thresholds / filters | Output |
| --- | --- | --- | --- | --- | --- |
| Keyword co-occurrence network, Figure 6A | Final unified txt dataset | VOSviewer 1.6.20 | Node type: all keywords. Analysis type: co-occurrence. Counting method: full counting. Normalization method: association strength. Clustering resolution: default value. | Keywords with frequency > 9 were included. | VOSviewer was used to generate the keyword co-occurrence network. |
| Keyword clustering timeline map, Figure 6B | Final unified txt dataset | CiteSpace 6.4.2 | Time slicing: 2000–2025; years per slice: 1. Node type: keyword. Selection criteria: g-index, default setting. Pruning: Pathfinder. Cluster-labeling method: LLR. | Keyword clusters were automatically generated by CiteSpace and checked by the researchers for interpretability. | CiteSpace was used to generate the keyword timeline map. |
| Tables 1–3 | TXT files exported from VOSviewer | VOSviewer 1.6.20; Microsoft Excel 2021 (2602) | Publication counts, citation frequency, co-citation frequency, and collaboration strength were extracted from VOSviewer outputs. | According to the ranking criteria stated in each table, the top 10 countries/regions, authors and institutions, journals, and co-cited journals were listed. | Excel was used only for tabulation, sorting, and calculation of average citations per publication. |
| Co-cited reference burst analysis, Table 4 | Final unified txt dataset | CiteSpace 6.4.2 | Time slicing: 2000–2025; years per slice: 1. Node type: reference. Selection criteria: g-index, default setting. Pruning: Pathfinder. Burst detection: Kleinberg’s burst-detection algorithm. | The top 20 co-cited references with the strongest citation bursts were displayed. | CiteSpace was used to detect citation bursts and generate the results summarized in Table 4. |
